# Supplementary material
Source: PubMed Central journal article supplement (PMC6576211)
Supplement: EMBJ-38-e102099-s001.pdf [file EMBJ-38-e102099-s001.pdf]

## **Appendix: Supplementary Figures**

### **Bronchioalveolar stem cells are a main source for regeneration of distal lung epithelia**

Isabelle Salwig<sup>1</sup>, Birgit Spitznagel<sup>1</sup>, Ana Ivonne Vazquez-Armendariz<sup>2</sup>, Keynoosh Khalooghi<sup>1</sup>, Stefan Guenther<sup>1</sup>, Susanne Herold<sup>2</sup>, Marten Szibor<sup>1,3</sup> and Thomas Braun<sup>1\*</sup>

<sup>1</sup>Max-Planck-Institute for Heart and Lung Research, Department of Cardiac Development and Remodeling, member of the German Center for Lung Research (DZL), Ludwigstr. 43, 61231 Bad Nauheim, Germany

<sup>2</sup>Department of Internal Medicine II, Universities of Giessen and Marburg Lung Center (UGMLC), member of the German Center for Lung Research (DZL), Klinikstr. 33, 35392 Giessen, Germany

<sup>3</sup>Current address: Faculty of Medicine and Life Sciences, University of Tampere, Arvo Ylpön katu 34, 33520 Tampere, Finland

**Content:** Appendix Figures S1-S4

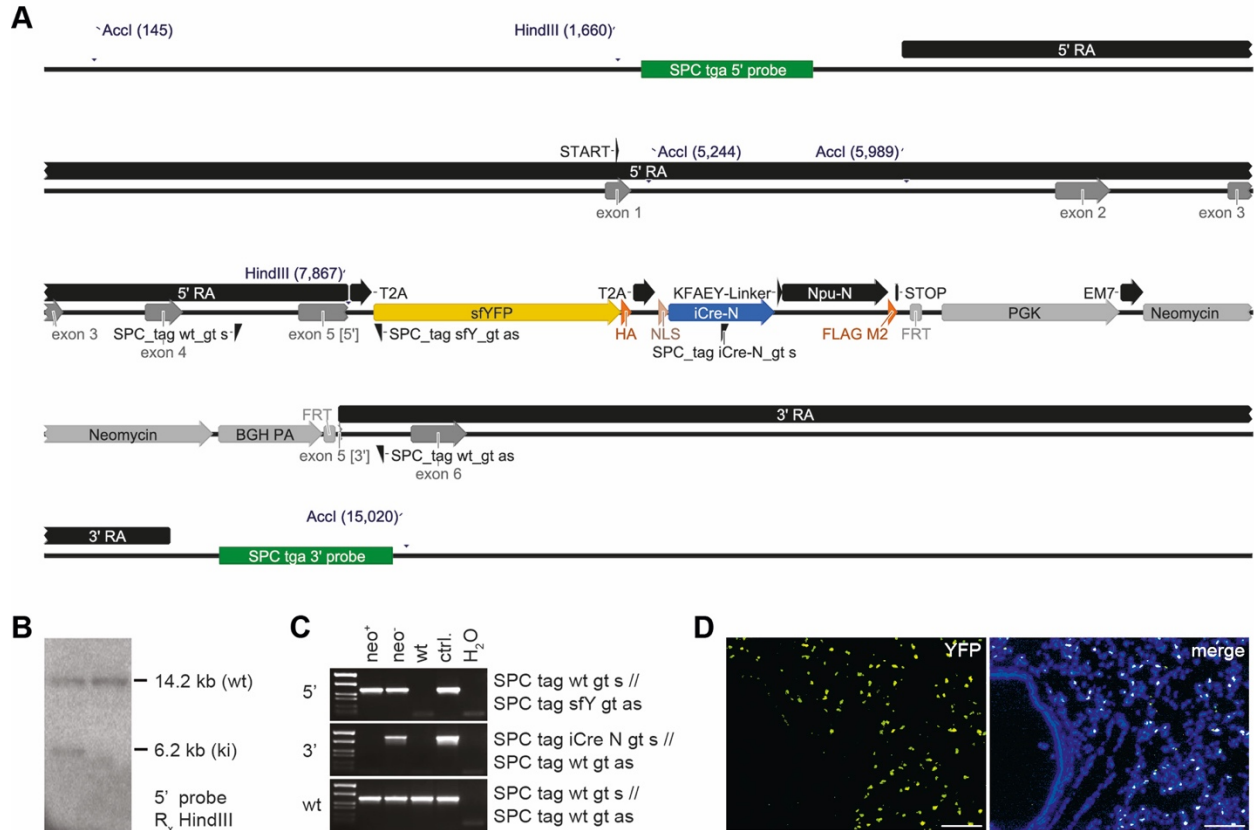

**Appendix Figure S1. Generation of the SPC<sup>-2A-YFP-2A-iCre-N</sup> knock-in strain.** **A.** Schematic representation of the SPC<sup>-2A-YFP-2A-iCre-N</sup> knock-in allele. Coding sequences of superfolder YFP and N-terminal split-Cre effector were inserted immediately upstream of the endogenous STOP codon of the SPC gene linked by 2A sequences. **B.** Southern Blot analysis of correct integration of the SPC<sup>-2A-YFP-2A-iCre-N</sup> knock-in allele. **C.** Allele-specific PCR analysis detects expected fragment sizes of 426 bp (ki 5'), 720 bp (ki 3') and 462 bp (wt). Deletion of the neomycin selection marker was verified using the 3' ki PCR. **D.** Epifluorescence analysis of lung sections from heterozygous SPC<sup>-2A-YFP-2A-iCre-N</sup> knock-in mice. YFP epifluorescence is restricted to the alveolar epithelium reflecting localization of AT2 cells. Blue: DAPI. Scale bar: 100  $\mu$ m. ki – knock-in, wt – wildtype.

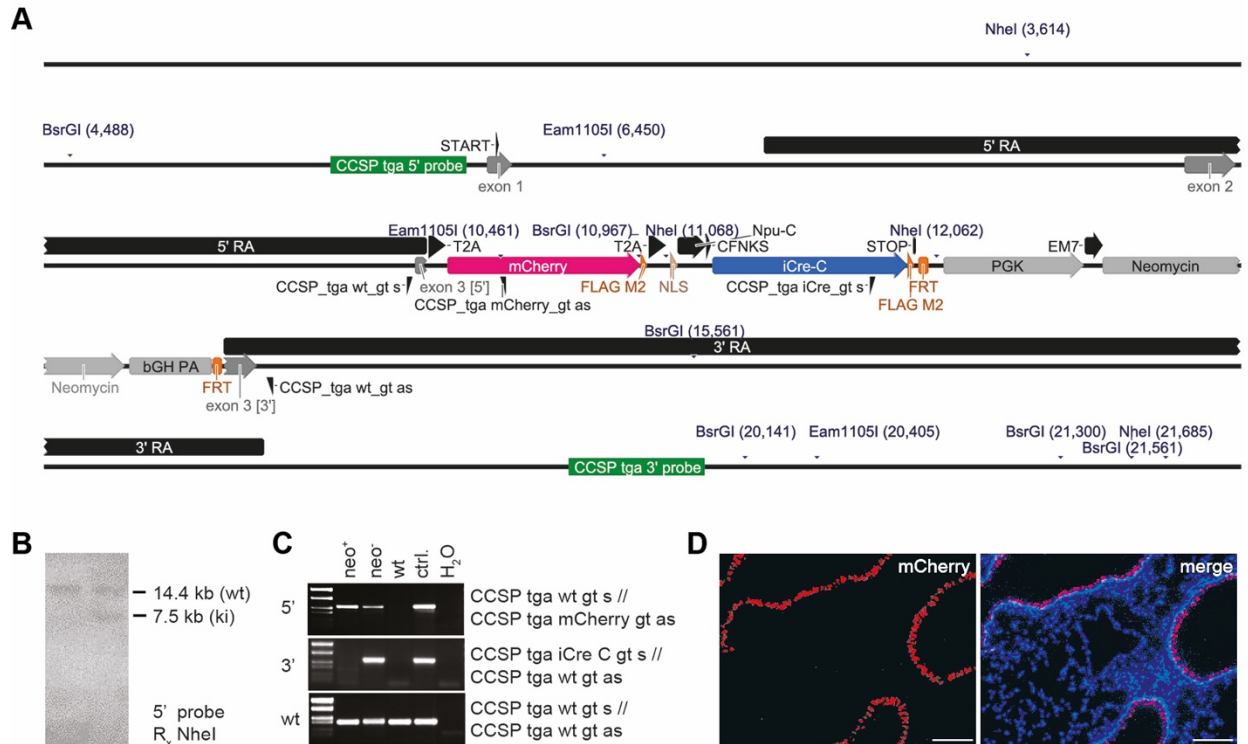

**Appendix Figure S2. Generation of the CCSP-2A.mCherry-2A-iCre-C knock-in strain.** **A.** Schematic representation of the CCSP-2A-mCherry-2A-iCre-C knock-in allele. Coding sequences of mCherry and C-terminal split-Cre effector were inserted immediately upstream of the endogenous STOP codon of the CCSP gene linked by 2A sequences. **B.** Southern Blot analysis of correct integration of the CCSP-2A-mCherry-2A-iCre-C knock-in allele. **C.** Allele specific PCR analysis detects expected fragment sizes of 363 bp (ki 5'), 401 bp (ki 3') and 258 bp (wt). Deletion of the neomycin selection marker was verified using the 3' ki PCR. **D.** Epifluorescence analysis of lung sections from heterozygous CCSP-2A-mCherry-2A-iCre-C knock-in mice. mCherry epifluorescence is restricted to the bronchiolar epithelium reflecting localization of Club cells. Blue: DAPI. Scale bar: 100 μm. ki – knock-in, wt – wildtype.

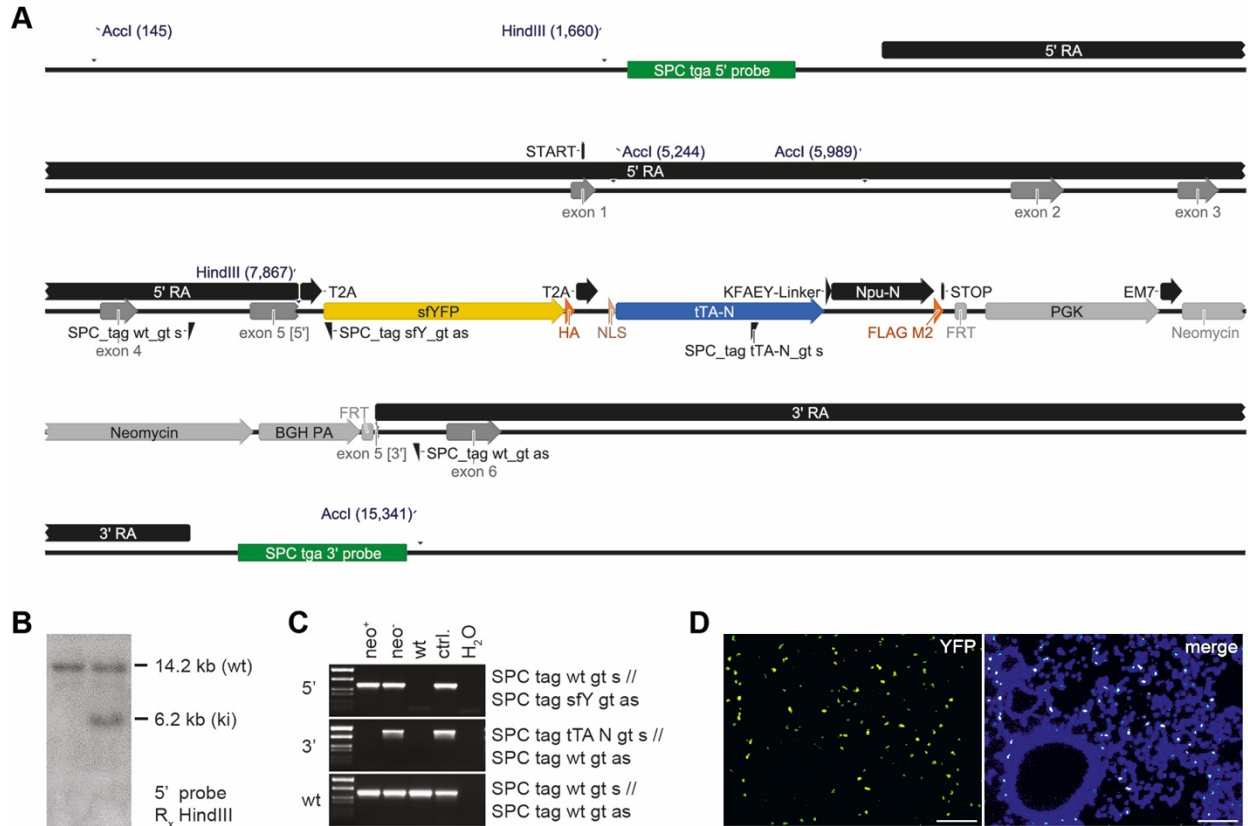

**Appendix Figure S3. Generation of the SPC<sup>-2A-YFP-2A-tTA-N</sup> knock-in strain.** **A.** Schematic representation of the SPC<sup>-2A-YFP-2A-tTA-N</sup> knock-in allele. Coding sequences of superfolder YFP and N-terminal split-tTA effector were inserted immediately upstream of the endogenous STOP codon of the SPC gene linked by 2A sequences. **B.** Southern Blot analysis of correct integration of the SPC<sup>-2A-YFP-2A-tTA-N</sup> knock-in allele. **C.** Allele specific PCR analysis detects expected fragment sizes of 426 bp (ki 5'), 776 bp (ki 3') and 462 bp (wt). Deletion of the neomycin selection marker was verified using the 3' ki PCR. **D.** Epifluorescence analysis of lung sections from heterozygous SPC<sup>-2A-YFP-2A-tTA-N</sup> knock-in mice. YFP epifluorescence is restricted to the alveolar epithelium reflecting localization of AT2 cells. Blue: DAPI. Scale bar: 100  $\mu$ m. ki – knock-in, wt – wildtype.

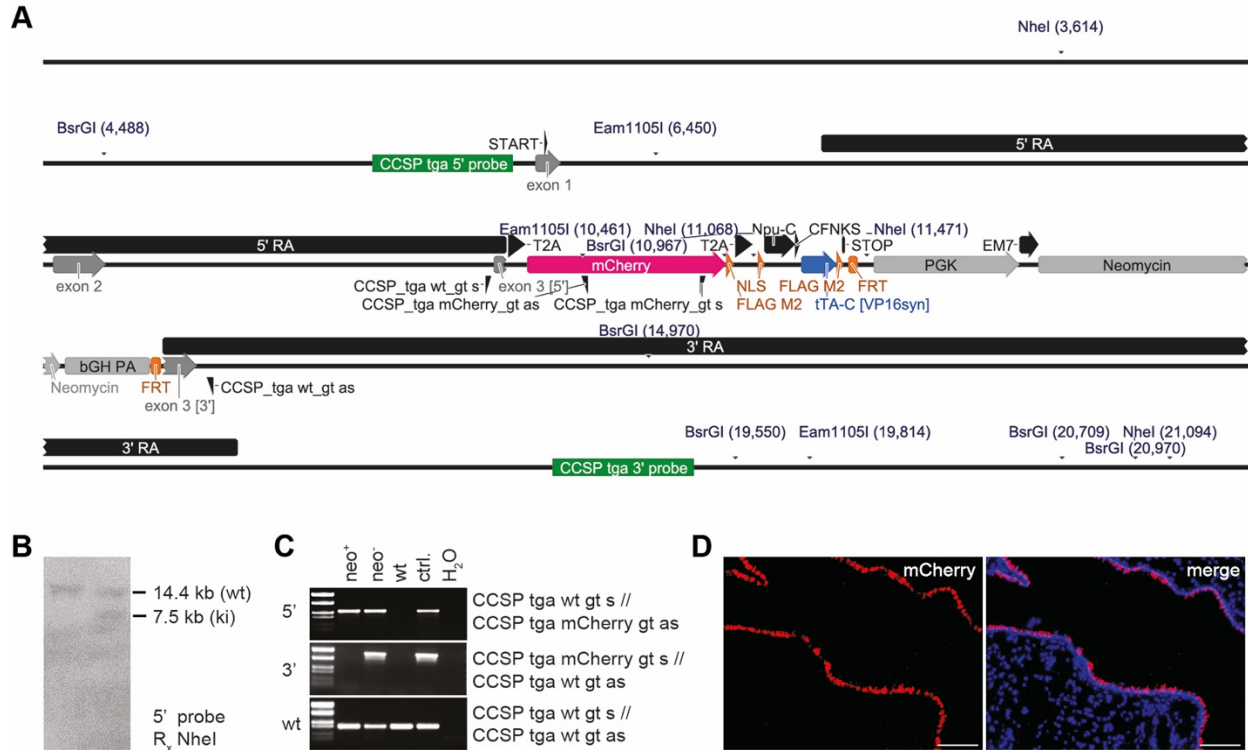

**Appendix Figure S4. Generation of the CCSP<sup>-2A-mCherry-2A-tTA-C</sup> knock-in strain.** **A.** Schematic representation of the CCSP<sup>-2A-mCherry-2A-tTA-C</sup> knock-in allele. Coding sequences of mCherry and C-terminal split-tTA effector were inserted immediately upstream of the endogenous STOP codon of the CCSP gene linked by 2A sequences. **B.** Southern Blot analysis of correct integration of the CCSP<sup>-2A-mCherry-2A-tTA-C</sup> knock-in allele. **C.** Allele specific PCR analysis detects expected fragment sizes of 363 bp (ki 5'), 748 bp (ki 3') and 258 bp (wt). **D.** Epifluorescence analysis of lung sections from heterozygous CCSP<sup>-2A-mCherry-2A-tTA-C</sup> knock-in mice. mCherry epifluorescence is restricted to the bronchiolar epithelium reflecting localization of Club cells. Blue: DAPI. Scale bar: 100  $\mu$ m. ki – knock-in, wt – wildtype.
